# Supplementary material
Source: publisher site journal article supplement (https://static.cambridge.org/content/id/urn:cambridge.org:id:article:S0007114520001853/resource/name/S0007114520001853supp001.xlsx)
Supplement: Supplementary file 1 [file S0007114520001853supp001.xlsx]

## Sheet: BJN
Supplemental Table 1. Microbial abundance (genus level; mean >0.1)
ID	001	002	003	004	005	006	007	008	009	010	011	012	013	014	015	016	017	018	019	020	021	022	023	024	025	026	027	028	029	030	031	032	033	034	035	036	037	038	039	040	041	042	043	044	045	046	047	048	049
E-DII group	3	2	1	2	3	3	2	2	1	2	2	2	1	1	1	3	1	3	2	2	1	1	1	3	3	3	3	2	1	3	1	1	3	3	2	3	1	3	2	1	3	1	2	3	1	1	2	2	3
Age group	1	1	1	2	1	2	1	1	1	1	1	1	1	1	1	1	1	1	2	1	1	2	2	1	1	1	1	1	1	2	1	2	1	1	1	2	1	1	1	2	1	1	1	1	1	1	1	2	2
BMI group	1	1	1	2	2	2	1	1	1	1	2	2	1	2	1	2	1	2	2	2	1	1	2	1	1	2	2	1	1	1	1	1	1	2	2	1	1	2	1	1	1	1	1	1	2	1	2	2	2
Bacteria|Bacteroidetes|Bacteroidia|Bacteroidales|Bacteroidaceae|Bacteroides	1853	2112	1491	1575	1606	1681	1035	671	2092	1570	1592	1686	296	146	1859	6	167	18	1817	1824	1001	2072	1634	1587	932	597	209	2035	905	445	682	918	567	1528	61	10	1731	10	977	475	308	1052	1685	657	1161	1581	714	359	1353
Bacteria|Proteobacteria|Gammaproteobacteria|Enterobacteriales|Enterobacteriaceae|Escherichia_Shigella	0	29	10	331	2	29	372	1104	423	72	5	3	1	4	136	0	1	391	8	90	21	3	92	70	228	11	0	0	4	1904	941	0	0	330	48	393	3	155	576	4	909	1	27	575	7	1	117	3	18
Bacteria|Bacteroidetes|Bacteroidia|Bacteroidales|Prevotellaceae|Prevotella_9	0	0	0	0	0	0	0	25	0	0	0	0	1489	2344	0	1759	0	67	0	0	0	0	0	0	39	264	1023	0	0	0	0	0	0	0	0	935	0	954	0	1104	0	0	0	0	0	0	0	293	0
Bacteria|Bacteroidetes|Bacteroidia|Bacteroidales|Rikenellaceae|Alistipes	2	0	126	5	255	107	837	135	8	125	316	239	121	6	55	3	90	0	127	46	373	15	0	37	136	124	64	114	108	51	270	298	54	146	35	4	40	0	80	121	0	38	0	40	14	20	50	78	284
Bacteria|Firmicutes|Clostridia|Clostridiales|Ruminococcaceae|Faecalibacterium	118	9	165	60	17	203	39	29	8	88	45	92	57	20	80	26	177	17	44	22	83	86	0	58	24	231	188	89	51	26	51	102	291	112	209	15	214	43	43	187	258	504	189	88	0	210	174	253	110
Bacteria|Proteobacteria|Gammaproteobacteria|Enterobacteriales|Enterobacteriaceae|Enterobacter	1	0	0	388	0	0	6	21	0	0	0	0	0	0	0	0	0	4	2	0	0	1	0	2	0	0	0	1	0	3	0	0	0	0	1797	1	0	5	0	0	206	0	0	6	1	0	0	0	0
Bacteria|Bacteroidetes|Bacteroidia|Bacteroidales|Porphyromonadaceae|Parabacteroides	178	0	59	31	0	21	59	0	74	18	42	61	20	4	90	0	791	1	235	68	75	0	337	609	75	28	46	31	69	0	15	18	76	161	0	5	64	8	85	89	31	22	203	7	229	0	272	53	116
Bacteria|Firmicutes|Clostridia|Clostridiales|Lachnospiraceae|Pseudobutyrivibrio	38	24	29	59	93	14	20	28	3	11	8	135	60	34	13	7	205	32	41	10	18	137	14	3	30	168	152	34	60	3	3	37	213	56	23	73	1	56	14	61	63	181	55	114	94	135	11	262	152
Bacteria|Verrucomicrobia|Verrucomicrobiae|Verrucomicrobiales|Verrucomicrobiaceae|Akkermansia	0	118	2	0	13	0	69	297	0	0	38	50	0	0	175	0	0	0	35	0	13	21	0	0	0	1	0	0	65	94	3	299	0	0	0	0	0	0	27	1	0	0	0	0	0	3	0	12	0
Bacteria|Firmicutes|Clostridia|Clostridiales|Lachnospiraceae|Lachnospiraceae_UCG_008	188	65	26	4	11	9	15	14	5	16	29	19	27	3	21	1	222	108	49	30	17	34	304	10	7	54	80	11	38	38	5	4	28	37	18	16	109	2	22	26	66	90	108	4	127	124	153	76	55
Bacteria|Firmicutes|Clostridia|Clostridiales|Lachnospiraceae|Blautia	12	8	49	27	71	19	29	7	1	38	29	39	16	2	15	13	230	38	47	76	50	66	79	5	46	84	71	22	47	4	16	21	166	29	130	7	61	9	15	59	107	143	86	21	92	105	54	84	25
Bacteria|Firmicutes|Clostridia|Clostridiales|Ruminococcaceae|Subdoligranulum	1	47	63	13	48	104	25	20	4	22	49	36	16	0	2	3	2	9	48	0	24	10	0	9	15	107	24	14	43	1	16	33	124	6	16	5	3	3	8	14	56	83	36	16	101	59	230	43	52
Bacteria|Firmicutes|Clostridia|Clostridiales|Lachnospiraceae|Lachnoclostridium	108	17	31	6	65	330	3	8	0	26	32	12	58	7	12	11	99	125	9	67	7	1	18	69	20	77	71	16	37	13	17	14	11	48	6	52	37	14	8	7	28	33	14	9	45	13	41	53	32
Bacteria|Firmicutes|Clostridia|Clostridiales|Lachnospiraceae|Anaerostipes	62	24	2	13	19	1	7	6	3	17	13	10	0	6	19	0	0	4	10	30	17	28	73	1	12	6	57	9	0	1	161	9	48	11	64	0	104	0	17	34	289	45	45	32	42	63	122	33	36
Bacteria|Firmicutes|Clostridia|Clostridiales|Lachnospiraceae|Lachnospiraceae_NK4A136_group	0	1	280	2	6	34	19	4	3	67	1	22	18	6	15	14	32	0	0	19	153	25	0	37	35	11	15	8	44	12	15	35	1	6	0	0	14	10	9	24	2	5	2	2	27	0	5	7	4
Bacteria|Firmicutes|Clostridia|Clostridiales|Lachnospiraceae|Dorea	22	21	0	6	6	12	9	13	0	20	11	2	11	3	9	16	94	106	22	199	3	12	29	3	42	47	10	16	33	11	11	5	36	17	73	30	18	4	31	24	28	35	29	5	50	28	21	131	24
Bacteria|Firmicutes|Negativicutes|Selenomonadales|Veillonellaceae|Dialister	4	2	2	0	4	6	9	0	0	2	1	3	0	20	3	36	0	79	0	0	0	0	0	9	3	1	124	0	27	0	0	0	54	0	0	124	0	5	20	0	0	0	21	5	0	19	1	53	5
Bacteria|Bacteroidetes|Bacteroidia|Bacteroidales|Prevotellaceae|Paraprevotella	0	60	0	135	0	0	0	0	0	0	0	0	111	0	0	3	0	33	0	0	0	0	116	0	0	3	60	0	0	0	0	34	134	0	0	0	96	0	0	0	0	0	0	0	0	0	0	69	0
Bacteria|Firmicutes|Clostridia|Clostridiales|Ruminococcaceae|Ruminococcaceae_UCG_002	0	0	1	0	40	0	10	24	3	40	31	35	0	2	1	12	0	0	0	0	80	4	1	0	219	88	6	12	35	1	10	103	6	1	1	62	0	32	9	19	0	0	0	4	75	1	8	30	21
Bacteria|Firmicutes|Clostridia|Clostridiales|Lachnospiraceae|Fusicatenibacter	89	13	41	0	17	4	6	6	1	17	3	12	6	4	12	1	125	15	34	10	24	31	0	1	1	28	10	26	15	1	2	27	61	2	13	0	5	0	17	10	78	72	18	22	53	41	81	50	27
Bacteria|Bacteroidetes|Bacteroidia|Bacteroidales|Prevotellaceae|Prevotella_2	0	0	0	0	0	0	0	0	0	0	0	0	0	0	0	38	0	0	0	0	0	0	0	0	0	0	0	0	0	0	0	0	0	0	0	82	0	301	0	0	0	0	1	0	0	0	0	0	0
Bacteria|Firmicutes|Clostridia|Clostridiales|Ruminococcaceae|Ruminococcaceae_UCG_014	0	1	9	3	1	0	2	18	0	7	1	0	5	1	3	12	25	2	1	0	44	1	0	0	10	16	0	4	1	0	6	14	81	3	39	8	17	1	5	19	16	49	9	10	0	1	8	20	5
Bacteria|Bacteroidetes|Bacteroidia|Bacteroidales|Porphyromonadaceae|Barnesiella	0	0	0	0	0	0	0	0	0	40	165	109	85	0	0	0	0	3	0	0	34	19	0	0	119	26	0	0	0	9	64	23	0	0	15	0	0	0	135	0	0	10	0	2	1	0	4	0	0
Bacteria|Proteobacteria|Gammaproteobacteria|Enterobacteriales|Enterobacteriaceae|Proteus	0	1	0	0	0	0	0	0	0	0	0	0	0	0	0	0	0	0	0	0	0	0	0	0	0	0	0	0	0	0	0	0	0	0	0	0	0	0	0	0	0	0	0	0	0	0	0	0	0
Bacteria|Proteobacteria|Betaproteobacteria|Burkholderiales|Alcaligenaceae|Parasutterella	6	55	14	0	0	0	16	8	0	107	5	42	0	1	44	0	109	0	48	0	0	22	0	1	0	3	4	1	43	9	0	18	0	0	15	0	0	0	33	0	8	0	0	0	0	5	9	0	99
Bacteria|Proteobacteria|Gammaproteobacteria|Pseudomonadales|Pseudomonadaceae|Pseudomonas	0	0	0	0	0	0	0	129	0	0	0	0	0	0	0	0	0	0	0	0	0	0	0	0	0	0	0	0	0	0	0	0	0	0	1	0	0	0	0	1	0	0	0	909	0	0	0	0	0
Bacteria|Firmicutes|Clostridia|Clostridiales|Ruminococcaceae|Ruminococcus_2	0	14	7	0	0	0	5	8	0	25	7	13	0	0	0	1	0	0	0	0	6	5	0	0	1	0	23	0	43	0	9	29	16	0	0	0	0	12	5	4	0	42	0	0	0	17	10	0	0
Bacteria|Firmicutes|Clostridia|Clostridiales|Ruminococcaceae|_Eubacterium_coprostanoligenes_group	0	0	2	0	8	1	1	2	0	5	11	1	0	10	2	2	0	0	0	0	41	3	1	0	15	91	184	6	14	1	15	98	5	3	1	10	0	109	0	94	0	9	0	3	217	12	25	4	0
Bacteria|Firmicutes|Clostridia|Clostridiales|Lachnospiraceae|_Eubacterium_hallii_group	11	15	5	9	9	4	13	8	2	8	3	7	5	7	4	1	79	19	15	5	7	16	0	0	8	15	1	5	6	19	8	1	19	22	18	8	0	2	12	11	49	14	33	10	33	61	59	26	18
Bacteria|Bacteroidetes|Bacteroidia|Bacteroidales|Prevotellaceae|Alloprevotella	0	0	0	0	0	0	0	0	0	0	0	0	0	0	0	146	0	0	0	0	0	0	0	0	55	0	0	0	0	0	0	0	0	0	0	178	0	36	0	125	0	0	0	0	0	0	0	0	0
Bacteria|Actinobacteria|Actinobacteria|Bifidobacteriales|Bifidobacteriaceae|Bifidobacterium	1	50	9	10	0	8	7	33	0	9	2	3	0	0	2	3	51	20	17	19	3	4	0	2	97	46	15	78	0	1	0	29	21	0	0	1	0	0	3	5	74	1	13	13	0	42	95	14	0
Bacteria|Firmicutes|Clostridia|Clostridiales|Lachnospiraceae|Roseburia	0	0	6	31	5	2	3	1	0	17	6	2	15	4	3	9	23	12	3	5	13	38	0	7	3	36	47	17	21	26	1	6	7	12	2	3	13	27	3	12	12	20	8	5	18	23	38	66	10
Bacteria|Firmicutes|Erysipelotrichia|Erysipelotrichales|Erysipelotrichaceae|Catenibacterium	0	0	0	0	0	0	0	0	0	0	0	0	0	0	0	29	0	357	0	0	0	0	0	0	0	0	0	33	0	0	0	0	0	0	19	55	0	7	0	0	0	0	0	112	0	0	0	0	0
Bacteria|Firmicutes|Clostridia|Clostridiales|Clostridiaceae_1|Clostridium_sensu_stricto_1	0	0	2	0	5	0	0	4	0	1	1	0	2	4	0	1	0	439	0	0	3	0	0	0	1	7	0	0	0	1	0	17	18	3	0	0	0	0	1	2	1	0	0	0	0	1	30	88	0
Bacteria|Firmicutes|Clostridia|Clostridiales|Peptostreptococcaceae|Intestinibacter	13	23	6	1	0	2	6	27	0	13	7	2	2	1	3	5	0	117	0	4	15	2	5	1	30	23	16	0	0	1	0	14	69	1	4	0	0	3	1	13	6	0	3	8	1	12	15	26	3
Bacteria|Firmicutes|Negativicutes|Selenomonadales|Acidaminococcaceae|Phascolarctobacterium	0	0	5	7	0	3	0	3	0	11	1	0	28	0	0	0	16	0	8	64	0	20	7	0	0	16	0	6	0	14	14	3	0	28	5	5	7	44	15	44	6	14	0	0	54	0	8	0	16
Bacteria|Firmicutes|Clostridia|Clostridiales|Lachnospiraceae|Lachnospiraceae_NC2004_group	0	15	0	0	1	0	10	1	0	0	1	12	0	4	3	0	0	0	0	0	45	0	0	0	19	20	0	6	8	0	0	9	112	0	0	0	11	0	1	0	4	0	4	3	0	14	9	4	0
Bacteria|Firmicutes|Clostridia|Clostridiales|Lachnospiraceae|Incertae_Sedis	0	0	36	1	0	0	6	2	0	19	2	2	3	1	3	7	8	0	0	0	62	4	0	0	3	6	0	2	15	3	29	15	52	8	9	0	0	3	2	5	14	45	3	2	5	4	1	1	1
Bacteria|Firmicutes|Clostridia|Clostridiales|Christensenellaceae|Christensenellaceae_R_7_group	0	0	1	0	1	0	5	7	0	22	2	6	0	0	1	1	0	0	0	0	48	0	0	0	69	11	9	0	8	0	49	74	4	5	0	1	0	0	1	1	0	24	0	6	0	0	1	22	6
Bacteria|Firmicutes|Erysipelotrichia|Erysipelotrichales|Erysipelotrichaceae|Erysipelotrichaceae_UCG_003	0	0	0	0	0	0	4	1	0	13	0	1	0	2	7	0	28	1	2	41	2	5	0	1	0	4	0	1	0	0	4	3	34	8	19	0	0	0	0	11	76	36	20	3	0	72	15	39	0
Bacteria|Proteobacteria|Alphaproteobacteria|Rhodospirillales|Rhodospirillaceae|Thalassospira	0	0	0	0	0	0	0	0	0	48	0	0	38	0	29	0	0	0	0	0	135	0	0	0	0	0	0	0	0	0	0	27	0	0	0	0	0	34	21	0	0	0	0	0	0	0	0	18	0
Bacteria|Proteobacteria|Gammaproteobacteria|Aeromonadales|Succinivibrionaceae|Succinivibrio	0	0	0	0	0	0	0	0	0	0	0	0	0	0	0	412	0	0	0	0	0	0	0	0	0	0	0	0	0	0	0	0	0	0	0	305	0	149	0	0	0	0	0	0	0	0	0	0	0
Bacteria|Firmicutes|Clostridia|Clostridiales|Ruminococcaceae|Ruminiclostridium_5	3	1	5	1	13	7	2	3	2	10	2	3	2	2	5	1	11	0	1	3	5	2	6	8	11	13	8	1	12	12	11	18	4	16	6	1	1	1	41	3	1	2	3	2	49	2	2	9	16
Bacteria|Firmicutes|Negativicutes|Selenomonadales|Veillonellaceae|Megamonas	0	0	0	0	0	0	0	0	0	0	0	0	75	0	0	0	0	600	0	0	0	0	0	0	0	0	0	28	0	0	0	0	0	0	0	0	0	0	0	0	0	0	0	0	0	0	0	30	0
Bacteria|Firmicutes|Clostridia|Clostridiales|Ruminococcaceae|Ruminiclostridium_6	0	0	88	0	6	0	0	3	0	5	4	0	1	0	0	0	0	0	0	0	7	5	0	0	82	0	0	0	6	1	12	19	0	0	0	0	0	5	2	0	0	0	2	0	0	0	0	2	0
Bacteria|Bacteroidetes|Bacteroidia|Bacteroidales|Porphyromonadaceae|Odoribacter	0	0	0	7	18	14	11	9	0	14	25	21	13	0	0	0	1	0	0	6	42	0	0	5	8	19	1	16	0	0	31	21	0	0	2	0	0	1	10	14	0	5	1	5	0	0	2	18	17
Bacteria|Firmicutes|Clostridia|Clostridiales|Ruminococcaceae|Ruminococcus_1	0	0	33	0	0	0	0	2	0	5	0	4	0	14	0	8	0	0	0	0	10	4	0	0	0	33	42	0	11	0	14	11	28	0	0	2	0	6	0	5	0	0	0	0	0	3	3	61	0
Bacteria|Firmicutes|Negativicutes|Selenomonadales|Veillonellaceae|Megasphaera	1	0	0	0	0	0	0	0	0	1	0	0	16	3	0	2	0	5	81	0	0	0	0	33	0	14	78	0	0	0	0	0	0	0	0	11	0	0	0	0	0	0	0	0	0	0	228	41	1
Bacteria|Firmicutes|Erysipelotrichia|Erysipelotrichales|Erysipelotrichaceae|Holdemanella	0	0	0	0	0	0	0	0	0	0	0	0	20	0	0	1	0	21	0	0	0	0	0	0	5	123	39	28	0	0	3	0	0	0	0	14	0	6	23	0	0	6	0	0	0	0	0	17	0
Bacteria|Bacteroidetes|Bacteroidia|Bacteroidales|Prevotellaceae|Prevotella_7	0	0	0	0	0	1	0	0	0	1	0	0	0	39	0	37	0	0	0	0	0	0	0	0	0	0	0	0	0	0	0	0	182	0	0	54	0	12	0	0	0	0	0	0	0	1	0	46	0
Bacteria|Firmicutes|Negativicutes|Selenomonadales|Acidaminococcaceae|Acidaminococcus	2	0	0	0	312	0	0	0	1	0	0	0	0	0	0	2	0	0	0	29	0	0	0	0	0	24	17	0	0	0	0	0	0	36	0	3	0	0	0	0	0	0	7	0	0	0	0	0	68
Bacteria|Tenericutes|Mollicutes|Mollicutes_RF9|f|g	0	0	0	0	0	0	0	19	0	0	0	0	0	0	0	0	0	0	0	0	120	0	0	0	7	0	0	0	0	0	90	40	0	0	0	0	0	0	0	0	0	0	0	0	0	0	0	45	0
Bacteria|Firmicutes|Clostridia|Clostridiales|Ruminococcaceae|uncultured	0	0	8	0	0	1	4	1	3	14	51	3	3	0	3	0	1	0	0	1	5	4	6	35	15	5	2	1	3	1	4	2	0	8	0	1	0	2	40	1	1	7	6	0	14	1	6	2	4
Bacteria|Firmicutes|Clostridia|Clostridiales|Lachnospiraceae|Lachnospira	0	0	10	1	0	0	2	0	0	1	0	2	4	9	8	3	6	0	0	0	1	0	0	0	2	9	2	9	9	0	20	1	5	5	0	1	0	3	0	5	1	27	1	4	0	0	4	7	18
Bacteria|Proteobacteria|Betaproteobacteria|Burkholderiales|Alcaligenaceae|Sutterella	0	0	0	0	2	3	20	0	0	0	0	0	55	0	0	1	0	0	15	5	0	0	0	0	1	47	0	0	0	0	12	0	0	0	0	1	1	15	0	1	0	29	17	2	0	0	6	14	0
Bacteria|Firmicutes|Bacilli|Lactobacillales|Streptococcaceae|Streptococcus	0	0	12	3	0	1	2	1	0	0	4	3	0	0	0	1	4	6	1	3	2	9	0	0	0	23	3	0	27	6	12	0	4	3	19	21	1	82	5	1	5	1	0	1	1	11	3	2	27
Bacteria|Proteobacteria|Deltaproteobacteria|Desulfovibrionales|Desulfovibrionaceae|Bilophila	0	0	12	0	0	6	2	2	0	5	4	1	2	0	14	0	8	1	0	22	0	7	2	1	24	4	6	0	4	5	4	3	2	21	0	0	2	0	26	4	0	0	25	1	14	4	10	4	7
Bacteria|Bacteroidetes|Bacteroidia|Bacteroidales|Porphyromonadaceae|Butyricimonas	0	0	6	0	0	14	9	4	7	6	81	2	15	0	0	0	0	0	0	0	0	0	0	11	1	0	0	2	0	0	2	4	0	0	0	0	0	0	8	14	0	3	0	2	2	3	0	0	0
Bacteria|Cyanobacteria|Chloroplast|o|f|g	0	0	0	0	0	0	0	0	0	0	0	0	0	0	0	0	0	0	0	0	0	0	0	0	0	0	0	0	0	0	0	0	0	0	0	0	1	0	1	0	0	0	0	0	0	0	0	0	0
Bacteria|Firmicutes|Clostridia|Clostridiales|Lachnospiraceae|Coprococcus_1	0	0	2	1	2	0	0	0	1	2	4	2	3	0	24	0	0	0	0	0	2	0	0	0	3	4	0	12	10	0	2	34	3	5	2	0	0	0	0	14	3	1	11	0	0	0	0	4	8
Bacteria|Bacteroidetes|Bacteroidia|Bacteroidales|Prevotellaceae|Prevotellaceae_NK3B31_group	0	0	0	0	0	0	0	0	0	71	0	0	0	0	0	0	0	0	0	0	0	0	0	0	0	0	0	0	0	0	0	0	0	0	0	11	0	68	0	0	0	0	0	0	0	0	0	0	0
Bacteria|Bacteroidetes|Bacteroidia|Bacteroidales|Prevotellaceae|uncultured	0	0	0	0	0	0	0	0	0	27	0	0	0	0	0	37	0	0	0	0	0	0	0	0	0	0	0	0	0	0	0	0	0	0	0	32	0	135	0	0	0	0	0	0	0	0	0	0	0
Bacteria|Firmicutes|Clostridia|Clostridiales|Lachnospiraceae|_Ruminococcus_gauvreauii_group	0	0	0	0	0	0	0	0	0	0	0	0	0	0	0	0	0	0	0	0	0	0	0	0	0	0	0	0	0	0	0	0	0	0	0	0	0	0	0	0	0	0	0	0	1	0	0	0	0
Bacteria|Proteobacteria|Gammaproteobacteria|Pasteurellales|Pasteurellaceae|Haemophilus	0	0	46	0	1	0	0	0	0	0	0	1	0	1	1	1	1	5	1	0	8	0	0	0	0	1	1	0	19	1	0	1	37	0	2	30	18	0	0	3	0	2	0	2	0	0	0	21	0
Bacteria|Bacteroidetes|Bacteroidia|Bacteroidales|Bacteroidales_S24_7_group|g	0	0	0	0	0	0	0	0	0	0	0	0	0	0	0	3	0	0	0	0	28	0	0	0	0	0	1	0	0	0	0	21	1	0	0	17	0	62	0	13	0	0	1	0	1	0	2	1	0
Bacteria|Firmicutes|Clostridia|Clostridiales|Ruminococcaceae|Ruminococcaceae_NK4A214_group	0	0	0	0	0	0	0	0	0	0	0	0	0	6	0	2	0	0	0	0	10	0	0	0	53	12	0	2	2	0	3	23	0	0	0	27	0	13	0	0	0	0	0	0	6	0	0	4	7
Bacteria|Firmicutes|Clostridia|Clostridiales|Ruminococcaceae|Ruminococcaceae_UCG_013	0	0	6	1	2	0	4	1	0	6	1	9	1	0	2	0	12	0	0	15	4	14	0	0	9	0	1	0	1	0	1	4	19	1	3	0	10	1	2	8	3	10	4	1	4	5	4	2	0
Bacteria|Firmicutes|Clostridia|Clostridiales|Lachnospiraceae|Coprococcus_2	0	0	0	0	0	0	0	1	0	0	0	0	0	3	0	47	0	0	0	0	4	0	0	0	24	0	0	0	0	0	0	4	8	0	0	0	0	5	0	0	0	30	0	0	0	0	1	37	0
Bacteria|Firmicutes|Bacilli|Bacillales|Planococcaceae|Domibacillus	0	0	0	0	0	0	0	1	0	0	0	0	0	0	0	0	0	0	0	0	0	0	0	0	0	0	0	0	0	0	0	0	0	0	0	0	0	0	0	0	2	0	0	10	0	0	0	0	0
Bacteria|Bacteroidetes|Bacteroidia|Bacteroidales|Rikenellaceae|Rikenellaceae_RC9_gut_group	0	0	0	0	0	0	0	0	0	0	0	0	0	0	0	0	0	0	0	0	0	0	0	0	0	0	0	0	0	0	0	0	0	0	0	28	0	45	0	0	0	0	0	0	0	0	0	0	0
Bacteria|Firmicutes|Clostridia|Clostridiales|Family_XI|Finegoldia	0	0	0	0	0	0	0	0	0	1	0	0	1	0	5	0	0	0	0	0	0	0	0	0	0	14	0	0	284	0	0	0	0	0	0	0	0	0	15	0	0	0	0	0	0	0	3	0	0
Bacteria|Firmicutes|Bacilli|Lactobacillales|Lactobacillaceae|Lactobacillus	0	3	0	0	0	1	0	2	0	0	0	0	0	5	0	3	0	50	0	0	0	1	0	0	0	2	0	34	0	0	0	0	0	3	0	1	0	2	41	1	0	0	0	0	0	19	1	0	4
Bacteria|Firmicutes|Clostridia|Clostridiales|Ruminococcaceae|Flavonifractor	2	4	2	0	0	7	0	0	14	0	3	0	1	0	0	0	0	0	2	0	0	0	1	47	18	3	2	0	0	1	0	0	0	0	0	0	7	0	14	0	1	2	8	0	3	0	2	1	1
Bacteria|Firmicutes|Clostridia|Clostridiales|Lachnospiraceae|uncultured	0	0	5	0	8	3	4	1	0	3	9	1	2	1	12	1	9	5	4	1	7	0	3	2	2	5	5	1	7	3	0	1	3	3	6	1	0	0	3	2	9	2	0	1	7	3	11	17	5
Bacteria|Bacteroidetes|Bacteroidia|Bacteroidales|Prevotellaceae|Prevotella	0	0	0	0	1	8	0	0	0	0	13	0	0	0	6	0	1	0	0	0	0	0	0	1	0	4	0	0	74	0	2	0	0	1	0	1	6	0	130	0	0	0	1	0	0	0	0	0	6
Bacteria|Proteobacteria|Deltaproteobacteria|Desulfovibrionales|Desulfovibrionaceae|Desulfovibrio	0	0	0	3	30	10	2	0	1	1	10	3	0	0	0	0	0	0	0	0	0	0	0	0	0	0	0	0	1	0	10	6	23	0	0	12	0	11	2	2	0	0	0	0	0	0	14	34	2
Bacteria|Actinobacteria|Coriobacteriia|Coriobacteriales|Coriobacteriaceae|Collinsella	1	0	2	0	4	8	2	2	0	6	3	3	3	2	2	0	6	9	2	0	0	0	0	0	6	29	9	3	0	2	0	0	0	1	20	3	0	1	2	17	0	5	5	1	0	5	23	1	7
Bacteria|Firmicutes|Clostridia|Clostridiales|Ruminococcaceae|Ruminiclostridium	0	4	6	0	5	0	1	1	2	8	0	1	2	0	2	0	7	2	1	1	0	2	0	1	2	2	3	2	3	0	0	2	41	5	2	0	10	1	2	1	1	5	1	2	1	4	20	2	5
Bacteria|Firmicutes|Clostridia|Clostridiales|Ruminococcaceae|Ruminococcaceae_UCG_003	0	0	3	5	0	5	13	1	0	3	2	13	2	1	0	0	0	0	0	0	2	0	0	0	12	23	0	1	6	0	0	26	1	6	0	4	7	5	0	1	0	3	2	1	0	0	0	3	1
Bacteria|Firmicutes|Clostridia|Clostridiales|Family_XI|Peptoniphilus	0	0	0	0	0	1	0	0	0	3	0	0	0	0	5	0	1	2	0	1	1	0	0	0	0	6	0	0	216	0	0	0	0	0	0	0	0	0	17	0	0	0	0	0	0	0	0	0	0
Bacteria|Firmicutes|Clostridia|Clostridiales|Ruminococcaceae|Anaerotruncus	0	0	1	0	4	0	0	1	2	1	0	0	0	0	0	1	0	0	0	0	1	0	0	9	2	5	2	0	1	2	28	4	0	0	0	9	0	4	2	1	0	0	2	1	2	0	1	7	1
Bacteria|Firmicutes|Bacilli|Lactobacillales|Leuconostocaceae|Weissella	0	0	0	0	0	0	0	0	0	0	0	0	0	0	0	0	0	0	0	0	0	0	0	0	0	0	0	0	0	0	3	0	40	0	0	0	0	0	0	0	0	0	0	0	154	0	0	0	0
Bacteria|Proteobacteria|Gammaproteobacteria|Enterobacteriales|Enterobacteriaceae|Hafnia	0	0	0	0	0	0	0	0	0	0	0	0	0	0	0	0	0	0	0	0	0	0	0	0	0	0	0	0	0	0	0	0	0	0	0	0	0	0	0	0	1	0	0	0	0	0	0	0	0
Bacteria|Firmicutes|Clostridia|Clostridiales|Ruminococcaceae|Ruminococcaceae_UCG_005	0	0	0	0	7	0	4	4	0	3	0	0	0	0	0	0	0	0	0	0	0	0	0	0	37	0	0	0	0	0	0	5	0	0	0	0	0	2	0	2	0	0	0	0	0	0	0	0	0
Bacteria|Bacteroidetes|Bacteroidia|Bacteroidales|Porphyromonadaceae|Dysgonomonas	0	0	0	0	0	0	0	0	0	0	0	0	0	0	0	0	0	0	0	0	0	0	0	0	0	0	0	0	0	0	0	0	0	0	0	0	0	0	0	0	0	0	0	0	0	0	0	0	0
Bacteria|Firmicutes|Clostridia|Clostridiales|Family_XI|Anaerococcus	0	0	0	0	1	0	0	0	0	2	4	0	0	0	2	0	0	1	0	0	1	0	0	0	2	5	0	0	140	0	0	0	1	1	0	0	0	0	26	0	0	0	0	0	0	0	0	0	0
Bacteria|Firmicutes|Clostridia|Clostridiales|Lachnospiraceae|Tyzzerella	0	0	0	0	6	5	0	0	2	0	0	0	0	0	0	0	0	0	0	0	0	5	0	7	5	0	0	0	0	8	0	0	0	1	0	0	8	0	3	2	0	1	2	0	22	0	0	0	0
Bacteria|Tenericutes|Mollicutes|Mollicutes_RF9|f|g	0	0	0	0	0	0	0	0	0	0	0	0	0	0	0	5	0	0	0	0	32	0	0	0	30	0	0	0	0	0	3	20	0	0	5	0	0	0	0	0	0	0	0	0	0	0	0	3	0
Bacteria|Firmicutes|Clostridia|Clostridiales|Lachnospiraceae|Lachnospiraceae_UCG_004	0	0	6	0	2	0	1	0	0	0	0	0	8	1	0	1	7	2	6	0	4	0	0	1	0	1	3	2	3	0	0	2	1	9	0	1	20	7	0	0	0	14	4	0	0	1	3	0	7
Bacteria|Firmicutes|Clostridia|Clostridiales|Lachnospiraceae|Tyzzerella_4	16	0	0	0	0	0	0	0	18	0	4	0	0	0	0	0	0	0	0	0	0	0	3	41	1	0	0	0	0	1	0	0	0	0	0	0	69	0	1	0	0	0	0	0	0	1	0	0	0
Bacteria|Bacteroidetes|Bacteroidia|Bacteroidales|Prevotellaceae|Prevotella_6	0	0	0	0	0	0	0	0	0	0	0	0	1	5	0	0	0	0	0	0	0	0	0	3	5	6	0	0	0	0	0	0	0	6	0	0	0	0	25	0	0	0	0	0	0	0	4	1	6
Bacteria|Firmicutes|Clostridia|Clostridiales|Lachnospiraceae|_Eubacterium_ventriosum_group	1	2	1	0	1	0	1	0	0	4	1	3	2	0	1	0	5	0	2	0	1	0	0	1	0	10	1	0	5	0	2	2	2	3	1	0	2	0	1	0	8	4	8	0	2	1	0	0	1
Bacteria|Proteobacteria|Betaproteobacteria|Burkholderiales|Comamonadaceae|Comamonas	0	0	0	0	0	0	0	0	0	0	0	0	0	0	0	0	0	0	0	0	0	0	0	0	0	0	0	0	0	0	0	0	0	0	0	0	0	0	0	0	0	0	0	0	0	0	0	0	0
Bacteria|Firmicutes|Clostridia|Clostridiales|Ruminococcaceae|Ruminococcaceae_UCG_010	0	0	0	0	0	0	0	1	0	6	2	1	0	0	0	0	0	0	0	0	4	0	0	0	21	2	0	0	1	0	8	37	0	0	0	0	0	1	0	0	0	0	0	0	0	0	0	1	0
Bacteria|Firmicutes|Clostridia|Clostridiales|Lachnospiraceae|Lachnospiraceae_UCG_010	0	0	0	0	0	0	0	0	0	0	0	2	7	0	0	0	51	0	0	0	3	0	1	0	1	3	0	0	7	0	4	0	0	9	0	0	0	7	1	0	0	0	10	0	0	0	0	7	7
Bacteria|Firmicutes|Bacilli|Lactobacillales|Streptococcaceae|Lactococcus	0	1	0	0	0	0	0	0	0	0	0	0	0	0	0	0	0	0	0	0	0	0	0	0	0	0	0	0	0	0	0	0	1	0	6	0	0	0	0	0	0	0	0	0	0	0	0	1	0
Bacteria|Fusobacteria|Fusobacteriia|Fusobacteriales|Fusobacteriaceae|Fusobacterium	0	0	0	0	0	3	0	0	0	0	7	0	0	0	0	0	1	0	0	23	0	1	2	0	0	0	1	0	0	0	0	0	1	2	0	0	12	30	3	0	0	0	0	0	0	0	0	0	0
Bacteria|Cyanobacteria|Melainabacteria|Gastranaerophilales|f|g	0	0	0	0	0	0	0	0	0	0	0	0	0	0	0	0	0	0	0	0	0	0	0	0	0	0	0	0	0	0	3	0	0	0	0	0	0	37	1	0	0	0	0	0	0	0	0	0	0
Bacteria|Bacteroidetes|Bacteroidia|Bacteroidales|Porphyromonadaceae|Porphyromonas	0	0	0	0	7	7	0	0	0	7	2	0	1	0	4	0	0	10	0	0	0	0	0	2	3	2	0	0	23	0	1	0	3	1	0	0	5	0	3	0	0	0	1	0	0	0	0	0	0
Bacteria|Firmicutes|Clostridia|Clostridiales|Clostridiales_vadinBB60_group|g	0	0	0	0	0	0	0	1	0	0	5	0	0	0	0	0	0	0	0	0	3	1	0	0	21	0	0	0	0	0	6	6	0	0	0	0	0	0	0	0	0	2	0	0	0	0	0	0	0
Bacteria|Firmicutes|Clostridia|Clostridiales|Lachnospiraceae|Lachnospiraceae_FCS020_group	0	2	1	0	1	1	1	0	0	0	1	0	1	0	0	0	10	0	2	0	3	1	0	0	0	4	2	2	3	0	0	0	2	0	1	1	0	0	0	3	0	1	0	0	3	1	1	4	2
Bacteria|Firmicutes|Erysipelotrichia|Erysipelotrichales|Erysipelotrichaceae|Turicibacter	0	0	0	0	0	0	1	3	0	1	1	0	0	0	0	2	0	1	0	0	3	0	0	0	1	1	0	0	0	0	0	0	0	0	2	0	0	0	1	1	0	0	0	0	0	5	1	1	0
Bacteria|Bacteroidetes|Bacteroidia|Bacteroidales|Porphyromonadaceae|Coprobacter	0	0	0	0	0	0	0	0	0	0	0	0	0	0	21	0	0	0	0	0	1	0	0	0	1	0	0	0	0	0	0	30	0	0	0	0	0	0	0	13	0	1	0	0	0	0	0	0	5
Bacteria|Firmicutes|Clostridia|Clostridiales|Family_XI|Ezakiella	0	0	0	0	2	3	0	0	0	0	5	0	0	0	2	0	0	2	0	0	0	0	0	0	0	8	0	0	31	0	1	0	1	0	0	0	2	0	0	0	0	0	0	0	0	0	0	0	0
Bacteria|Proteobacteria|Epsilonproteobacteria|Campylobacterales|Campylobacteraceae|Campylobacter	0	0	0	0	0	0	0	0	3	5	8	0	1	1	11	0	0	0	0	0	0	0	0	0	2	6	0	0	0	0	1	0	0	2	0	0	0	2	30	0	0	0	0	0	0	0	0	0	0
Bacteria|Firmicutes|Negativicutes|Selenomonadales|Veillonellaceae|Veillonella	0	0	1	2	0	0	0	1	0	0	0	0	0	0	0	0	1	0	0	0	1	0	0	0	0	0	0	0	0	2	0	1	4	0	0	6	0	15	1	1	0	0	0	0	0	1	0	1	2
Bacteria|Firmicutes|Bacilli|Bacillales|Bacillaceae|Bacillus	0	0	0	0	0	0	0	2	0	0	0	0	0	0	0	0	0	0	0	0	0	0	0	0	0	0	0	0	0	0	0	0	0	0	0	0	0	0	0	0	0	0	0	0	0	0	0	0	0
Bacteria|Actinobacteria|Actinobacteria|Corynebacteriales|Corynebacteriaceae|Corynebacterium_1	0	0	0	0	0	1	0	0	0	0	0	0	1	0	0	0	0	1	0	0	0	0	0	0	0	2	0	0	17	0	0	1	3	0	0	0	0	0	23	0	0	0	0	0	0	0	0	0	0
Bacteria|Firmicutes|Clostridia|Clostridiales|Lachnospiraceae|Marvinbryantia	0	0	0	0	0	0	0	0	0	2	0	0	1	0	0	1	0	0	0	0	0	0	0	0	0	0	0	0	2	0	1	4	0	0	6	1	0	1	1	1	0	0	0	0	0	0	0	2	0
Bacteria|Firmicutes|Erysipelotrichia|Erysipelotrichales|Erysipelotrichaceae|Erysipelatoclostridium	2	0	0	1	0	1	0	0	2	0	0	0	0	0	0	0	4	0	0	1	0	1	5	1	0	0	1	0	1	2	0	0	0	0	1	0	3	0	14	0	2	0	0	0	0	1	1	0	1
Bacteria|Tenericutes|Mollicutes|NB1_n|f|g	0	0	0	0	0	0	0	7	0	0	0	0	0	0	0	0	0	0	0	0	0	0	0	0	0	0	0	0	0	0	0	0	0	0	0	0	0	0	0	0	0	0	0	0	0	0	0	1	0
Bacteria|Firmicutes|Erysipelotrichia|Erysipelotrichales|Erysipelotrichaceae|Dielma	0	0	0	0	0	5	0	0	39	0	7	0	0	0	2	0	0	0	0	0	0	0	0	3	0	1	0	0	0	0	0	0	0	0	0	0	0	0	5	0	0	1	0	0	0	0	0	0	0
Bacteria|Actinobacteria|Coriobacteriia|Coriobacteriales|Coriobacteriaceae|uncultured	0	0	0	0	0	0	0	1	0	0	0	0	2	1	0	0	0	1	0	0	0	0	0	0	0	0	0	0	0	0	1	0	1	0	2	0	0	1	0	2	0	3	0	0	0	0	4	1	1
Bacteria|Firmicutes|Clostridia|Clostridiales|Family_XIII|_Eubacterium_nodatum_group	0	0	0	0	1	0	2	0	0	3	2	0	0	0	3	0	1	1	0	0	0	0	0	0	2	5	1	0	0	0	1	1	0	2	1	1	0	3	0	2	0	0	0	1	0	0	0	0	2
Bacteria|Firmicutes|Clostridia|Clostridiales|Ruminococcaceae|Oscillibacter	0	0	2	0	0	2	0	0	0	4	0	1	2	0	0	0	0	0	0	0	0	0	0	0	0	1	0	0	0	0	0	0	0	1	0	0	0	0	1	0	1	5	0	0	2	0	0	0	6
Bacteria|Firmicutes|Bacilli|Lactobacillales|Carnobacteriaceae|Granulicatella	0	0	0	0	0	0	0	0	0	0	0	0	0	0	0	0	6	0	0	0	0	0	0	0	1	0	0	0	0	0	1	0	0	0	6	0	0	2	0	0	3	0	0	0	0	0	0	0	0
Bacteria|Firmicutes|Negativicutes|Selenomonadales|Veillonellaceae|Mitsuokella	0	0	0	0	0	0	0	0	0	0	0	0	0	0	0	1	0	0	0	0	0	0	0	0	0	0	0	0	0	0	0	0	0	0	0	15	0	7	0	0	0	0	0	0	0	0	0	0	0
Bacteria|Bacteroidetes|Bacteroidia|Bacteroidales|Prevotellaceae|Prevotella_1	0	0	0	0	0	0	0	0	0	0	0	0	0	0	0	0	0	0	0	0	0	0	0	0	0	0	0	0	0	0	0	0	0	0	0	0	0	51	0	0	0	0	0	0	0	0	0	0	0
Bacteria|Firmicutes|Erysipelotrichia|Erysipelotrichales|Erysipelotrichaceae|Incertae_Sedis	0	0	0	0	0	1	0	0	14	2	4	0	0	0	1	0	0	0	0	0	0	0	2	1	1	0	0	0	1	1	0	0	0	0	0	0	1	0	0	0	1	0	1	1	1	1	0	0	0
Archaea|Euryarchaeota|Methanobacteria|Methanobacteriales|Methanobacteriaceae|Methanobrevibacter	0	0	0	0	0	0	0	2	0	0	0	0	0	0	0	0	0	0	0	0	0	0	0	0	0	0	0	0	0	0	2	2	0	0	0	0	0	0	0	0	0	0	0	0	0	0	0	1	0
Bacteria|Firmicutes|Clostridia|Clostridiales|Family_XIII|Family_XIII_UCG_001	0	0	2	0	0	0	0	0	0	0	1	1	0	1	0	0	1	0	0	0	0	0	0	0	1	1	0	1	2	0	0	0	1	0	0	1	0	3	1	1	0	0	0	0	0	0	0	1	1
Bacteria|Firmicutes|Clostridia|Clostridiales|Lachnospiraceae|Lachnospiraceae_UCG_001	0	0	0	0	0	0	0	0	0	0	0	0	0	0	0	0	7	0	0	0	2	0	0	0	0	0	0	0	0	0	0	0	1	0	0	0	2	0	0	0	0	0	2	2	0	0	0	2	0
Bacteria|Firmicutes|Clostridia|Clostridiales|Peptococcaceae|Peptococcus	0	0	0	0	0	0	0	0	0	2	3	0	0	0	0	0	0	0	0	0	0	0	0	0	2	0	0	0	2	0	0	1	0	0	0	1	0	0	1	0	0	0	0	0	0	0	0	1	0
Bacteria|Firmicutes|Clostridia|Clostridiales|Peptococcaceae|uncultured	0	0	0	0	0	0	0	0	0	0	0	0	0	0	0	0	0	0	0	0	1	0	0	0	0	0	0	0	0	0	1	1	0	0	0	0	0	0	0	0	0	0	0	0	0	0	0	0	0
Bacteria|Proteobacteria|Betaproteobacteria|Burkholderiales|Oxalobacteraceae|Oxalobacter	0	0	0	0	0	0	0	0	0	0	0	0	0	0	0	0	3	0	0	0	0	0	0	0	5	0	0	0	0	0	8	1	0	0	0	0	0	0	0	0	0	0	0	0	0	0	0	1	1
Bacteria|Bacteroidetes|Bacteroidia|Bacteroidales|Porphyromonadaceae|uncultured	0	0	0	0	0	0	0	0	0	0	0	0	0	0	0	0	0	0	0	0	0	0	0	0	0	0	0	0	0	0	0	23	0	0	0	0	0	0	0	0	0	0	0	0	0	0	0	0	0
Bacteria|Actinobacteria|Coriobacteriia|Coriobacteriales|Coriobacteriaceae|Senegalimassilia	0	0	0	0	0	0	1	0	0	0	2	0	0	0	0	0	0	0	0	0	1	0	0	0	0	0	0	0	0	0	0	0	0	0	0	1	0	2	0	0	0	0	0	0	0	0	0	3	2
Bacteria|Firmicutes|Clostridia|Clostridiales|Family_XIII|Mogibacterium	0	0	0	0	0	0	0	0	0	0	0	4	0	0	0	0	0	0	0	0	0	0	0	0	0	1	0	0	7	0	0	0	0	0	0	0	0	5	0	1	0	0	0	0	0	0	0	0	0
Bacteria|Bacteroidetes|Bacteroidia|Bacteroidales|Prevotellaceae|Prevotellaceae_UCG_003	0	0	0	0	0	0	0	0	0	0	0	0	0	0	0	0	0	0	0	0	0	0	0	0	0	0	0	0	0	0	0	0	0	0	0	5	0	4	0	0	0	0	0	0	0	0	0	0	0
Bacteria|Firmicutes|Clostridia|Clostridiales|Lachnospiraceae|Oribacterium	0	0	0	0	0	0	0	0	0	0	0	0	0	0	0	0	0	0	0	0	0	0	0	0	0	0	0	0	0	0	0	0	0	0	0	13	0	3	0	0	0	0	0	0	0	0	0	0	0
Bacteria|Firmicutes|Clostridia|Clostridiales|Peptostreptococcaceae|Peptostreptococcus	0	0	0	0	0	1	0	0	0	0	0	0	0	1	1	0	0	0	0	0	0	0	0	5	0	0	0	0	0	0	0	0	0	0	0	0	0	0	0	0	1	0	0	0	0	0	0	0	0
Bacteria|Firmicutes|Erysipelotrichia|Erysipelotrichales|Erysipelotrichaceae|Solobacterium	0	0	0	0	0	0	0	0	0	0	0	0	0	0	0	0	0	0	0	0	0	0	0	0	7	0	0	0	0	0	0	0	0	0	0	5	0	1	0	0	0	0	0	0	0	0	0	0	0
Bacteria|Firmicutes|Clostridia|Clostridiales|Family_XIII|uncultured	0	0	0	0	0	3	0	0	0	1	2	0	0	0	0	0	0	0	0	0	0	0	0	0	0	0	0	0	21	0	0	0	0	0	0	0	0	0	0	0	0	0	0	0	0	0	0	0	0
Bacteria|Firmicutes|Clostridia|Clostridiales|Family_XIII|Family_XIII_AD3011_group	0	0	0	0	0	0	0	0	0	1	0	0	2	0	0	0	0	0	0	0	0	0	0	0	5	0	0	0	0	0	2	1	0	0	0	0	0	0	0	0	0	0	0	0	0	0	0	0	1
Bacteria|Firmicutes|Clostridia|Clostridiales|Ruminococcaceae|Ruminococcaceae_UCG_008	0	0	0	0	0	0	0	0	0	0	0	0	0	0	0	2	0	0	0	0	0	0	0	0	0	0	0	0	0	0	0	21	0	0	0	0	0	0	0	0	0	0	0	0	0	0	0	0	0
Bacteria|Firmicutes|Erysipelotrichia|Erysipelotrichales|Erysipelotrichaceae|Holdemania	0	0	0	0	0	0	0	0	0	2	0	0	0	0	1	0	0	0	1	0	0	0	0	0	0	2	0	0	1	0	0	0	0	0	0	0	1	0	1	0	0	0	0	2	0	0	0	0	0
Bacteria|Actinobacteria|Coriobacteriia|Coriobacteriales|Coriobacteriaceae|Eggerthella	0	0	0	0	0	1	0	0	0	0	1	0	0	0	1	0	0	0	1	0	0	0	0	1	0	0	0	0	1	0	0	0	0	0	0	0	2	0	1	0	2	0	0	0	2	1	0	0	1
Bacteria|Firmicutes|Erysipelotrichia|Erysipelotrichales|Erysipelotrichaceae|Faecalitalea	1	1	0	0	0	0	0	0	0	0	0	0	0	0	1	0	0	0	0	0	0	0	0	0	0	0	1	0	3	0	0	0	0	1	0	0	0	0	0	0	0	0	2	1	0	0	0	0	3
Bacteria|Firmicutes|Clostridia|Clostridiales|Ruminococcaceae|Ruminiclostridium_9	0	0	0	0	0	0	0	0	0	1	0	1	0	0	0	0	0	0	0	0	1	0	0	0	0	0	0	0	0	0	2	2	0	0	0	1	0	2	0	0	0	0	0	0	0	0	0	0	0
Bacteria|Actinobacteria|Coriobacteriia|Coriobacteriales|Coriobacteriaceae|Atopobium	0	0	0	0	0	0	0	0	0	0	2	0	0	0	0	0	0	0	0	0	0	0	0	0	0	0	0	0	0	0	0	0	0	0	0	0	0	0	0	0	0	0	0	0	0	0	0	0	2
Bacteria|Firmicutes|Clostridia|Clostridiales|Christensenellaceae|uncultured	0	0	1	0	0	3	1	0	1	0	0	0	0	0	0	0	0	0	0	0	0	0	0	0	2	0	0	0	1	0	1	0	0	0	0	0	0	0	0	0	0	0	0	0	0	0	0	0	0
Bacteria|Actinobacteria|Actinobacteria|Actinomycetales|Actinomycetaceae|Actinomyces	0	0	0	0	0	0	0	0	0	0	0	0	0	0	0	0	2	0	0	0	0	0	0	0	0	2	0	0	3	1	0	0	0	0	0	0	0	1	1	0	1	0	0	0	0	1	0	0	0
Bacteria|Firmicutes|Negativicutes|Selenomonadales|Veillonellaceae|Allisonella	0	0	0	0	0	0	0	0	0	0	0	0	0	0	0	0	0	0	0	0	0	0	0	0	0	0	0	0	0	0	0	0	0	2	0	1	0	4	0	0	0	0	0	0	0	0	0	3	0
Bacteria|Actinobacteria|Actinobacteria|Actinomycetales|Actinomycetaceae|Varibaculum	0	0	0	0	0	0	0	0	0	0	0	0	0	0	0	0	0	0	0	0	0	0	0	0	0	0	0	0	14	0	0	0	0	0	0	0	0	0	4	0	0	0	0	0	0	0	0	0	0
Bacteria|Fusobacteria|Fusobacteriia|Fusobacteriales|Fusobacteriaceae|Cetobacterium	0	0	0	0	0	0	0	0	0	0	0	0	0	0	0	0	0	0	0	0	0	0	0	0	0	0	0	0	0	0	0	0	0	0	0	0	0	0	0	0	0	0	0	0	0	0	0	0	0
Bacteria|Fusobacteria|Fusobacteriia|Fusobacteriales|Leptotrichiaceae|Sneathia	0	0	0	0	0	15	0	0	0	0	2	0	0	0	0	0	0	0	0	0	0	0	0	0	0	0	0	0	0	0	0	0	0	0	0	0	0	0	0	0	0	0	0	0	0	0	0	0	0
Bacteria|Firmicutes|Clostridia|Clostridiales|Lachnospiraceae|_Eubacterium_oxidoreducens_group	0	0	0	0	0	0	0	0	0	0	0	0	0	0	0	0	0	0	0	0	0	0	0	0	0	0	0	0	1	1	0	0	3	0	0	0	0	0	0	1	0	0	0	0	0	0	0	3	0
Bacteria|Firmicutes|Erysipelotrichia|Erysipelotrichales|Erysipelotrichaceae|Candidatus_Stoquefichus	6	0	0	0	0	0	0	0	0	0	0	0	0	0	0	0	0	0	0	0	0	0	0	0	0	2	0	0	2	0	0	0	0	0	0	0	0	0	0	0	0	0	0	1	0	0	0	0	0
Bacteria|Actinobacteria|Actinobacteria|Bifidobacteriales|Bifidobacteriaceae|Gardnerella	0	0	0	0	0	0	0	0	0	0	0	0	0	0	0	0	0	0	0	0	0	0	0	0	0	0	0	0	0	0	0	0	0	0	0	0	0	0	0	0	0	0	0	0	0	0	1	0	10
Bacteria|Firmicutes|Clostridia|Clostridiales|Ruminococcaceae|Ruminiclostridium_1	0	0	0	0	0	0	1	0	0	1	0	0	0	0	0	0	0	0	0	0	0	0	0	0	0	0	0	0	0	0	11	0	0	0	0	0	0	0	0	0	0	0	0	0	0	0	0	0	0
Bacteria|Bacteroidetes|Bacteroidia|Bacteroidales|Prevotellaceae|Prevotellaceae_UCG_001	0	0	0	0	0	0	0	0	0	0	0	0	0	0	0	0	0	0	0	0	0	0	0	0	0	0	0	0	0	0	0	0	0	0	0	0	0	3	0	0	0	0	0	0	0	0	0	0	0
Bacteria|Firmicutes|Clostridia|Clostridiales|Lachnospiraceae|Tyzzerella_3	0	0	0	0	0	0	0	0	0	0	0	0	0	0	0	0	0	0	0	0	0	0	0	0	0	0	0	0	0	0	0	0	6	3	1	0	3	0	0	0	0	0	0	0	0	0	0	0	0
Bacteria|Actinobacteria|Coriobacteriia|Coriobacteriales|Coriobacteriaceae|Enterorhabdus	0	0	0	0	0	0	0	0	0	0	0	0	0	0	0	0	0	0	0	0	3	0	0	0	0	0	0	0	0	0	0	0	0	0	0	0	0	0	0	0	0	0	0	0	0	0	0	0	2
Bacteria|Firmicutes|Clostridia|Clostridiales|Ruminococcaceae|Oscillospira	0	0	0	0	0	0	0	0	0	0	0	0	0	0	0	0	0	0	0	0	0	0	0	0	0	0	0	0	0	0	0	0	0	0	0	0	0	0	0	0	0	0	2	0	4	0	0	0	0
Bacteria|Firmicutes|Bacilli|Bacillales|Family_XI|Gemella	0	0	1	0	0	2	0	0	0	0	0	0	0	0	0	0	0	0	0	0	0	0	0	0	0	0	0	0	0	0	0	0	0	0	0	0	0	1	0	1	0	0	0	2	0	0	0	0	0
Bacteria|Proteobacteria|Betaproteobacteria|Burkholderiales|Alcaligenaceae|Achromobacter	0	0	0	0	0	0	0	0	0	0	0	0	0	0	0	0	0	0	0	0	0	0	0	0	0	0	0	0	0	0	0	0	0	0	0	0	0	0	0	0	0	0	0	0	0	0	0	0	0
Bacteria|Firmicutes|Clostridia|Clostridiales|Ruminococcaceae|Ruminococcaceae_UCG_011	0	0	0	0	0	0	0	0	0	0	0	0	0	0	0	0	0	0	0	0	0	0	0	0	0	0	0	0	0	0	0	11	0	0	0	0	0	0	0	0	0	0	0	0	0	0	0	0	0
Bacteria|Firmicutes|Clostridia|Clostridiales|Family_XI|Murdochiella	0	0	0	0	1	0	0	0	0	0	0	0	0	0	2	0	0	0	0	0	0	0	0	0	0	1	0	0	7	0	0	0	0	0	0	0	0	0	0	0	0	0	0	0	0	0	0	0	0
Bacteria|Firmicutes|Erysipelotrichia|Erysipelotrichales|Erysipelotrichaceae|uncultured	0	0	0	0	0	0	0	0	0	0	0	0	0	0	0	0	0	0	0	0	0	0	0	0	0	0	0	0	0	0	0	0	0	0	5	0	0	6	0	0	0	0	0	0	0	0	0	0	0
[truncated: 53 more columns]
